# Supplementary material
Source: Springer Nature journal article supplement (https://www.springermedizin.de/resource/supplementary/12943_2011_1044_MOESM5_ESM.pdf/9552212)

**A**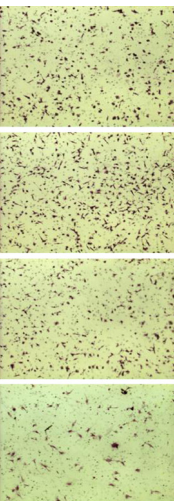

### Estrogen Induced HUVEC Migration

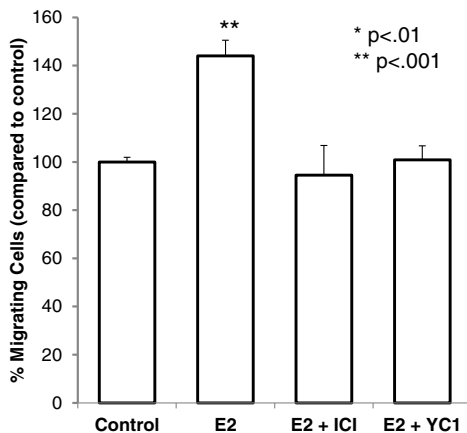**B**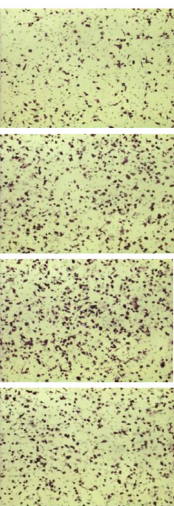

### Hypoxia Induced HUVEC Migration

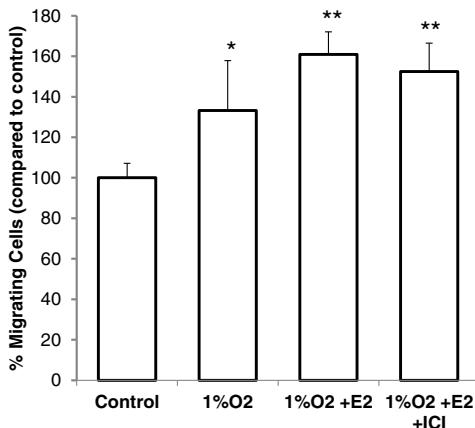

Supplement: MOESM5 [file 9552212]
